# Supplementary material for: First principles assessment of perovskite dopants for proton conductors with chemical stability and high conductivity
Source: Royal Society of Chemistry journal article supplement (doi:10.1039/c2ra23405j), 2012-12-22
Supplement: c2ra23405j.pdf [file c2ra23405j.pdf]

Supplementary Information for  
**First Principles Assessment of Perovskite Dopants for Proton Conductors with Chemical Stability and High Conductivity**

Sung Gu Kang and David S. Sholl\*

*School of Chemical and Biomolecular Engineering, Georgia Institute of Technology, 311 Ferst Dr., Atlanta, GA 30332-0100, USA*

Table S.1 shows determined energy barriers for all 10 proton hops using DFT for each of the 13 dopants we considered.

**Table S.1** Energy barriers of the proton in the case where a dopant is a nearest neighbor of the initial or final proton, where M = Y, Er, Ho, Al, Ga, Dy, In, Sc, La, Nd, Pm, Sm, and Tl.

|            | Y    | Er   | Ho   | Al   | Ga   | Dy   | In   | Sc   | La   | Nd   | Pm   | Sm   | Tl   |
|------------|------|------|------|------|------|------|------|------|------|------|------|------|------|
| Transfer 1 | 0.98 | 0.74 | 0.84 | 0.64 | 0.41 | 0.95 | 0.56 | 0.28 | 2.18 | 1.94 | 1.72 | 1.58 | 1.46 |
| Transfer 2 | 0.35 | 0.32 | 0.33 | 0.18 | 0.21 | 0.34 | 0.30 | 0.22 | 0.53 | 0.48 | 0.45 | 0.40 | 0.40 |
| Transfer 3 | 0.55 | 0.44 | 0.48 | 0.45 | 0.08 | 0.53 | 0.34 | 0.13 | 1.57 | 1.31 | 1.13 | 0.77 | 0.89 |
| Transfer 4 | 0.59 | 0.52 | 0.55 | 0.69 | 0.37 | 0.57 | 0.49 | 0.39 | 1.11 | 1.04 | 0.92 | 0.70 | 0.90 |
| Transfer 5 | 0.40 | 0.40 | 0.40 | 0.80 | 0.72 | 0.40 | 0.45 | 0.57 | 0.61 | 0.54 | 0.46 | 0.45 | 0.49 |
| Transfer 6 | 0.39 | 0.33 | 0.36 | 0.06 | 0.12 | 0.38 | 0.28 | 0.18 | 0.77 | 0.65 | 0.56 | 0.53 | 0.51 |
| Transfer 7 | 0.29 | 0.29 | 0.29 | 0.29 | 0.29 | 0.29 | 0.29 | 0.29 | 0.29 | 0.29 | 0.29 | 0.29 | 0.29 |
| Rotation 1 | 0.84 | 0.68 | 0.75 | 0.30 | 0.16 | 0.84 | 0.46 | 0.13 | 2.48 | 2.10 | 1.31 | 1.23 | 1.38 |
| Rotation 2 | 0.11 | 0.12 | 0.11 | 0.17 | 0.17 | 0.47 | 0.14 | 0.17 | 0.08 | 0.07 | 0.07 | 0.07 | 0.61 |
| Rotation 3 | 0.15 | 0.15 | 0.15 | 0.15 | 0.15 | 0.15 | 0.15 | 0.15 | 0.15 | 0.15 | 0.15 | 0.15 | 0.15 |

---

\* Corresponding author. Email: david.sholl@chbe.gatech.edu
